# Supplementary material
Source: MDPI journal article supplement (https://www.mdpi.com/2306-5710/9/1/17)
Supplement: s1 [file s1]

Supplementary Materials

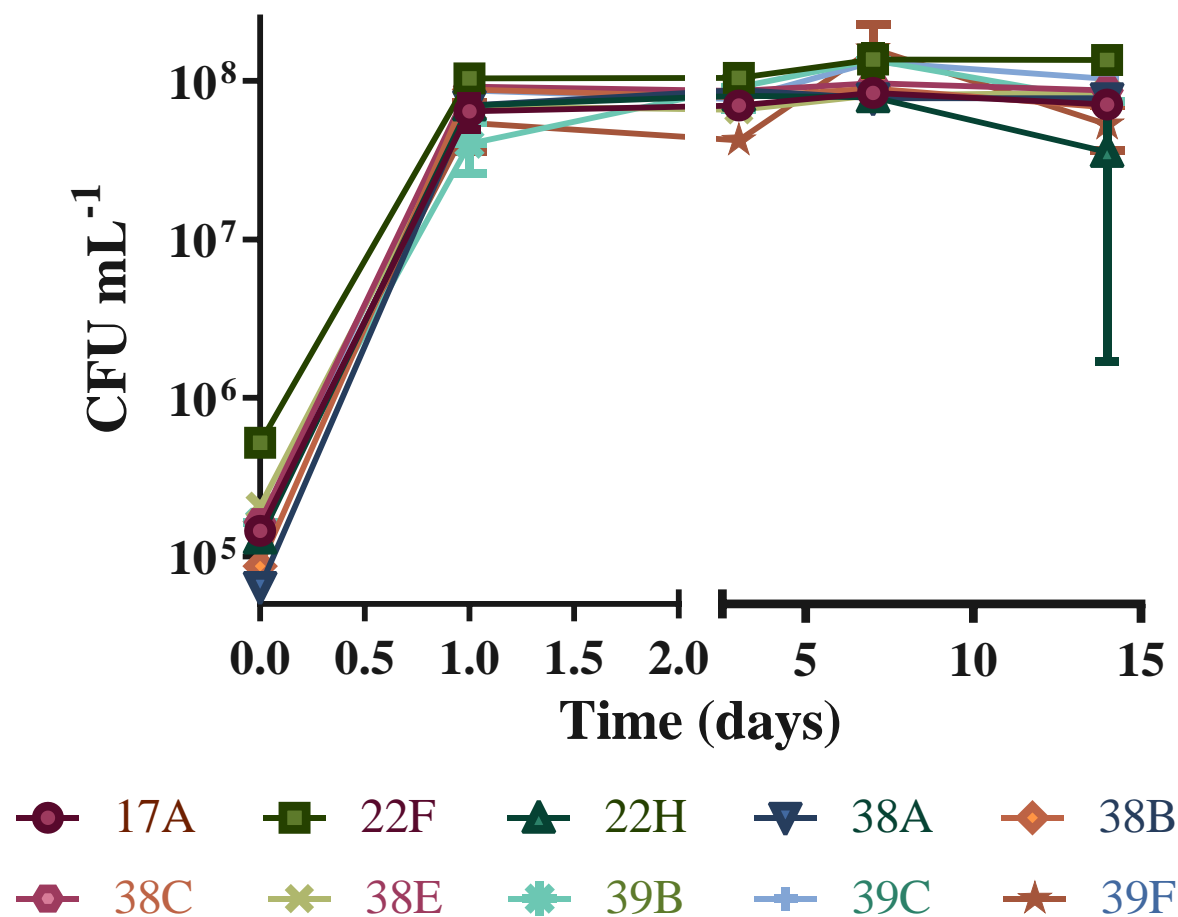

Figure S1. Growth kinetics recorded for the different *S. cerevisiae* strains grown in sterile grape Garnacha for 14 days.

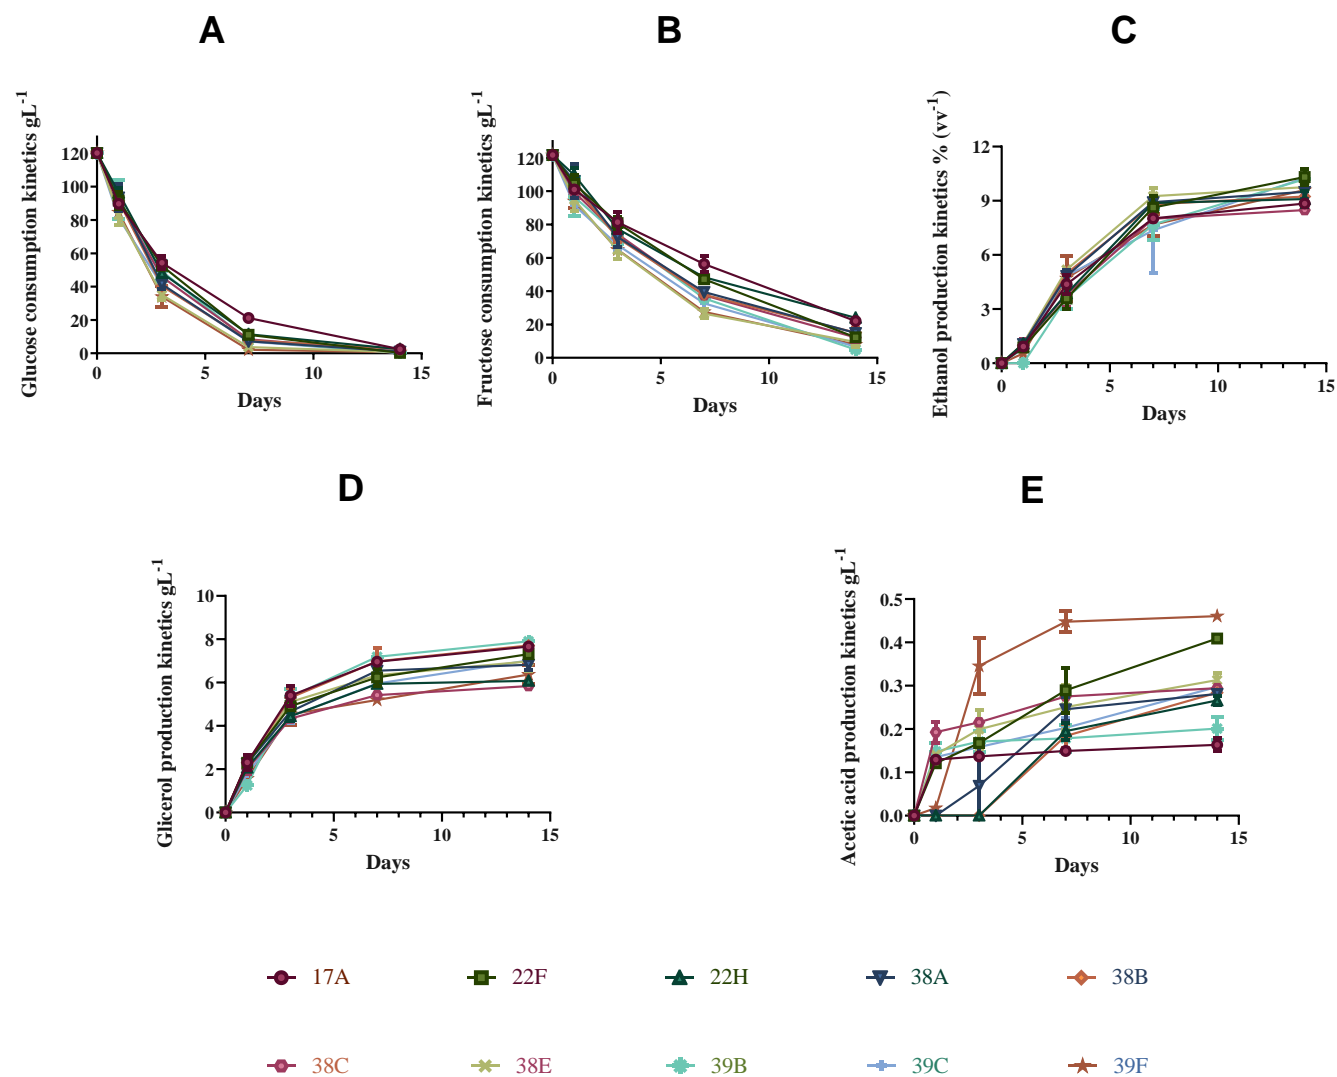

**Figure S2.** Sugar consumption and products production kinetics during 14 days from the beginning of yeast inoculation. Glucose consumption kinetics expressed in g/L (A), fructose consumption kinetics expressed in g/L (B), ethanol production kinetics expressed in % (v/v) (C), glycerol production kinetics expressed in g/L (D), acetic acid production kinetics expressed in g/L (E).
